# Supplementary material for: Mariner transposons are sailing in the genome of the blood-sucking bug Rhodnius prolixus
Source: Springer Nature journal article supplement (doi:10.1186/s12864-015-2060-9), 2015-12-01
Supplement: 12864_2015_2060_MOESM1_ESM.pdf [file 12864_2015_2060_MOESM1_ESM.pdf]

**Table S1.**

Transposases sequences used as queries in the TBLASTN search (GI, family and subfamily) with the number of clusters obtained by a reciprocal BLASTX using the longest element of each cluster.

| <b>Transposase</b>        | <b>Accession (GI) or reference</b> | <b>Family based on catalytic domain</b> | <b>Subfamily</b> | <b>Number of clusters</b> |
|---------------------------|------------------------------------|-----------------------------------------|------------------|---------------------------|
| <i>mariner</i> search     |                                    |                                         |                  |                           |
| MOS1                      | 75009976                           | <i>mariner</i> (DD(34)D)                | mauritiana       | 12                        |
| HVMAR1                    | 1708663                            | <i>mariner</i> (DD(34)D)                |                  | 2                         |
| DGMAR1                    | 887424                             | <i>mariner</i> (DD(34)D)                | cecropia         | 3                         |
| CEMAR1                    | 7331903                            | <i>mariner</i> (DD(34)D)                | elegans          | 0                         |
| FAMAR1                    | 75008822                           | <i>mariner</i> (DD(34)D)                | mellifera        | 22                        |
| PACMAR2                   | 19692999                           | <i>mariner</i> (DD(34)D)                | marmorata        | 1                         |
| DROMAR23                  | Wallau <i>et al.</i> 2014          | <i>mariner</i> (DD(34)D)                | irritans         | 17                        |
| DROMAR8                   | Wallau <i>et al.</i> 2014          | <i>mariner</i> (DD(34)D)                | drosophila       | 32                        |
| <i>Non-mariner</i> search |                                    |                                         |                  |                           |
| Tc1                       | 141446                             | <i>Tc1</i> (DD34)E                      |                  | 8                         |
| Tc3                       | 464866                             | <i>Tc1</i> (DD34)E                      |                  | 4                         |
| S                         | 2133730                            | <i>Tc1</i> (DD34)E                      |                  | 20                        |
| Ag                        | 16266047                           | DD(37)E                                 |                  | 0                         |
| Tc4                       | 156453                             | <i>Pogo</i> (DDxD)                      |                  |                           |
| Jerky                     | 157822169                          | <i>Pogo</i> (DDxD)                      |                  | 7                         |
| Tigger1                   | 2226004                            | <i>Pogo</i> (DDxD)                      |                  | 3                         |
| PogoR11                   | 2133672                            | <i>Pogo</i> (DDxD)                      |                  |                           |
| Lemi1                     | 4262216                            | <i>Pogo</i> (DDxD)                      |                  |                           |
| Fot1                      | 2723                               | <i>Pogo</i> (DDxD)                      |                  |                           |
| Fot5                      | 38520869                           | <i>Pogo</i> (DDxD)                      |                  | 2                         |
| Bmmar1                    | 1698453                            | DD(37)D                                 |                  | 7                         |
| Ant1                      | 191148                             | DDxE                                    |                  | 1                         |
| Offalax                   | 438828                             | DDxE                                    |                  |                           |
| rhizobium                 | 1072027                            | DDxE                                    |                  | 2                         |
