# Supplementary material for: Mariner transposons are sailing in the genome of the blood-sucking bug Rhodnius prolixus
Source: Springer Nature journal article supplement (doi:10.1186/s12864-015-2060-9), 2015-12-01

**Figure S2 : A.** Histograms showing the positions of the breakpoints in copies showing a rearranged structure. Copies were retrieved after megablastn using the full-length sequence as query, and were reversed-blasted against the full-length sequence. Only copies displaying hits on both strands were kept. **B.** Plot density illustrating the nonrandom distribution of breakpoints in A and B parts together). **C.** Scatter plot showing breakpoints in A part vs B part for each copy.

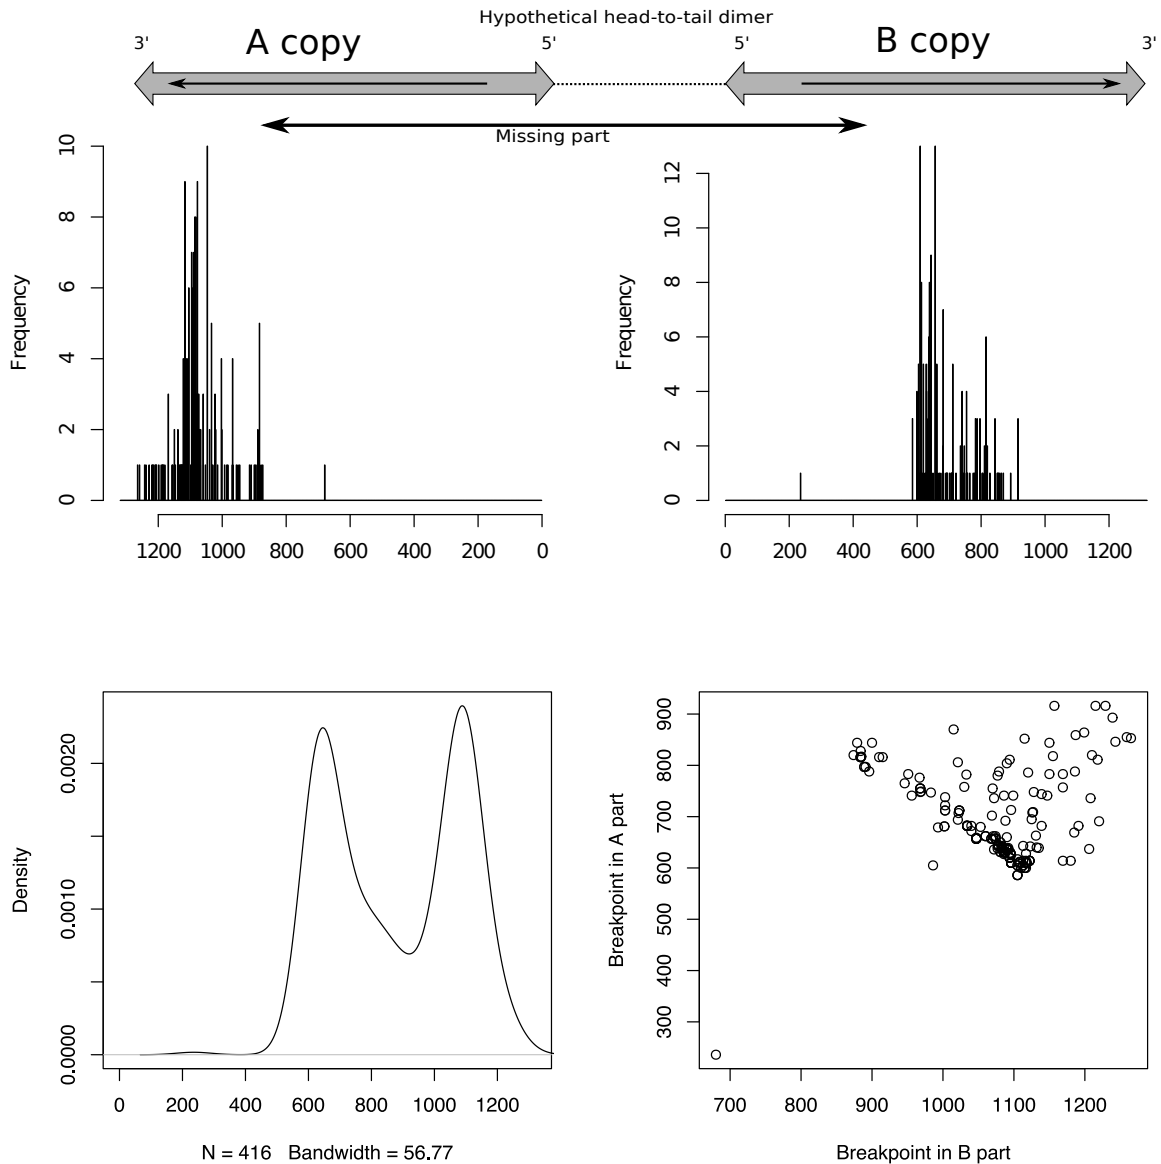

Supplement: 12864_2015_2060_MOESM2_ESM.pdf [file 12864_2015_2060_MOESM2_ESM.pdf]
